# Supplementary material for: Total number of reads affects the accuracy of fetal fraction estimates in NIPT
Source: PubMed Central journal article supplement — Mol Genet Genomic Med. 2021 Mar 9;9(4):e1653. doi: 10.1002/mgg3.1653 (PMC8123752; doi:10.1002/mgg3.1653), 2021-03-09
Supplement: MGG3-9-e1653-s001.pdf [file MGG3-9-e1653-s001.pdf]

### Kruskal–Wallis test outcome

| Number of reads | p-values |
|-----------------|----------|
| 2000000         | 0.242    |
| 3000000         | 0.027    |
| 4000000         | 0.577    |
| 5000000         | 0.980    |
| 6000000         | 0.027    |
| 7000000         | 0.635    |
| 8000000         | 0.968    |
| 9000000         | 0.619    |
| 10000000        | 0.610    |
| 11000000        | 0.803    |
| 12000000        | 0.145    |
| 13000000        | 0.392    |
| 14000000        | 0.780    |
| 15000000        | 0.315    |
| 16000000        | 0.721    |
| 17000000        | 0.486    |
| 18000000        | 0.171    |
| 19000000        | 0.989    |
| 20000000        | 0.648    |
| 21000000        | 0.595    |
| 22000000        | 0.979    |
| 23000000        | 0.515    |
| 24000000        | 0.805    |
| 25000000        | 0.976    |
| 26000000        | 0.696    |
| 27000000        | 0.723    |
| 28000000        | 0.832    |
| 29000000        | 0.939    |
| 30000000        | 0.701    |
