# Supplementary material for: Total number of reads affects the accuracy of fetal fraction estimates in NIPT
Source: PubMed Central journal article supplement — Mol Genet Genomic Med. 2021 Mar 9;9(4):e1653. doi: 10.1002/mgg3.1653 (PMC8123752; doi:10.1002/mgg3.1653), 2021-03-09

Computational sample

reshuf\_2percent

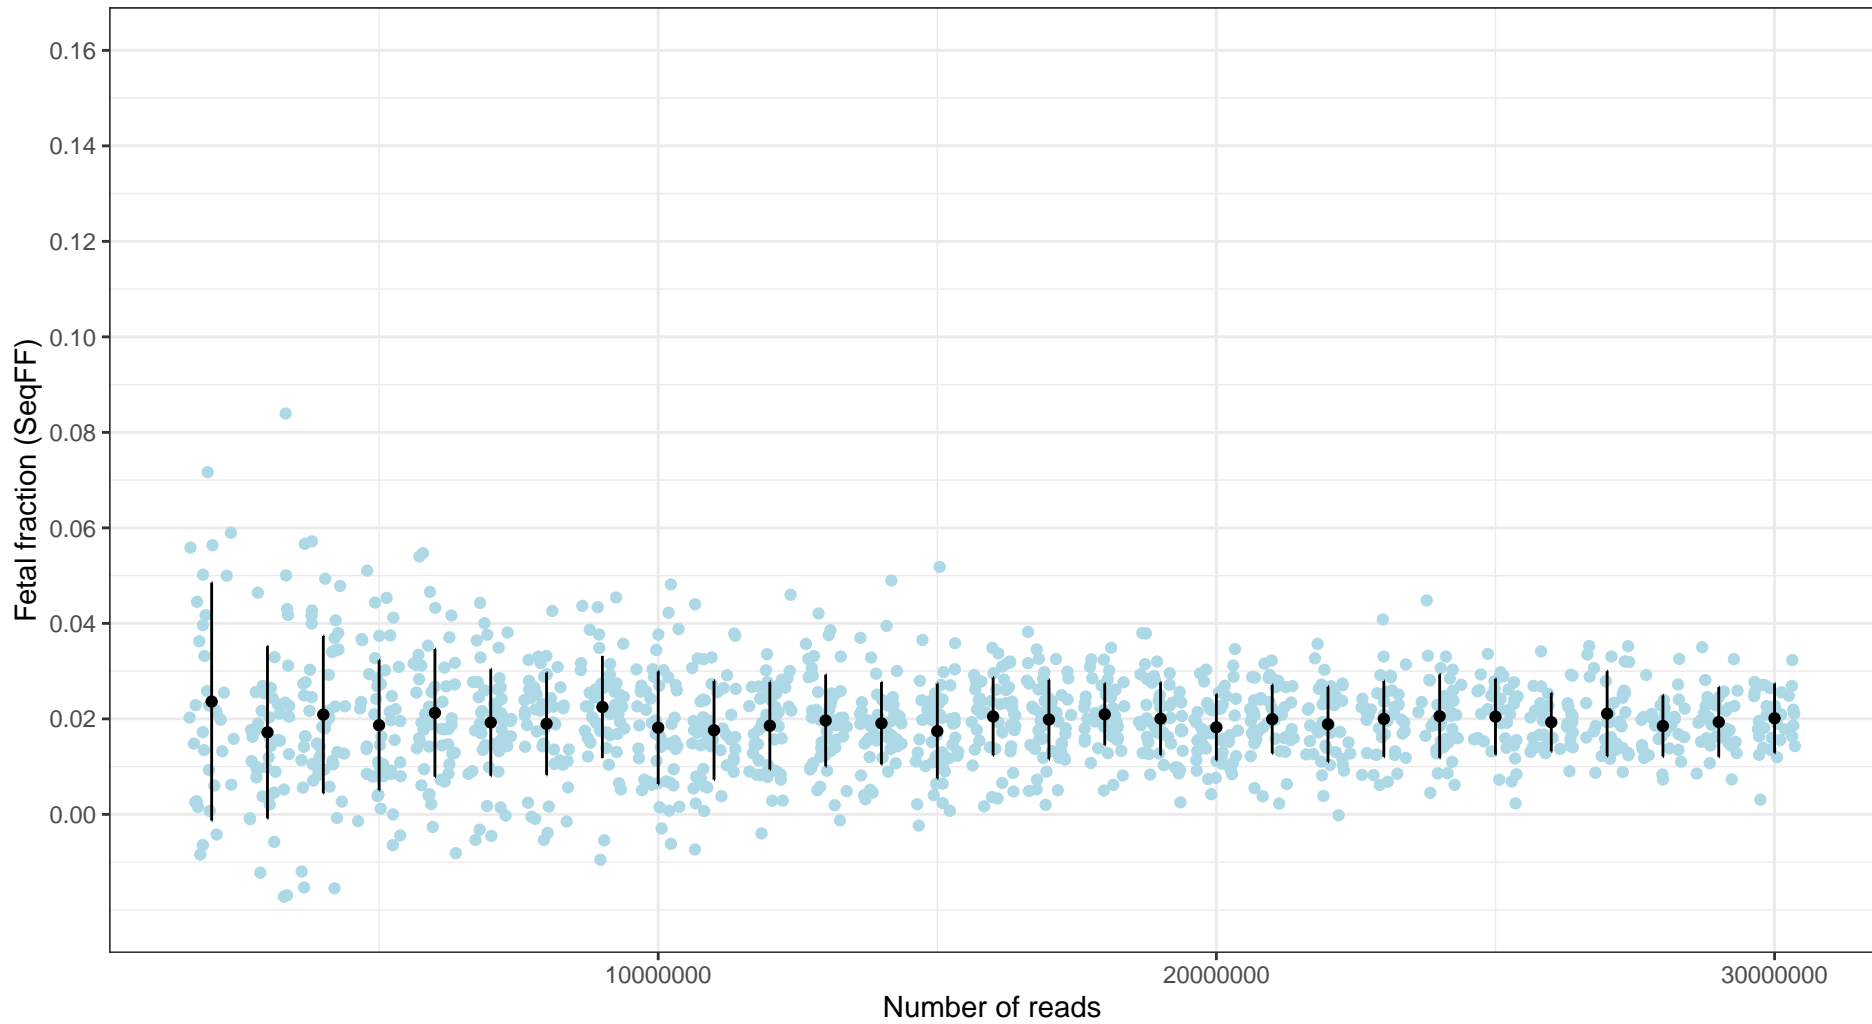

Computational sample

reshuf\_3percent

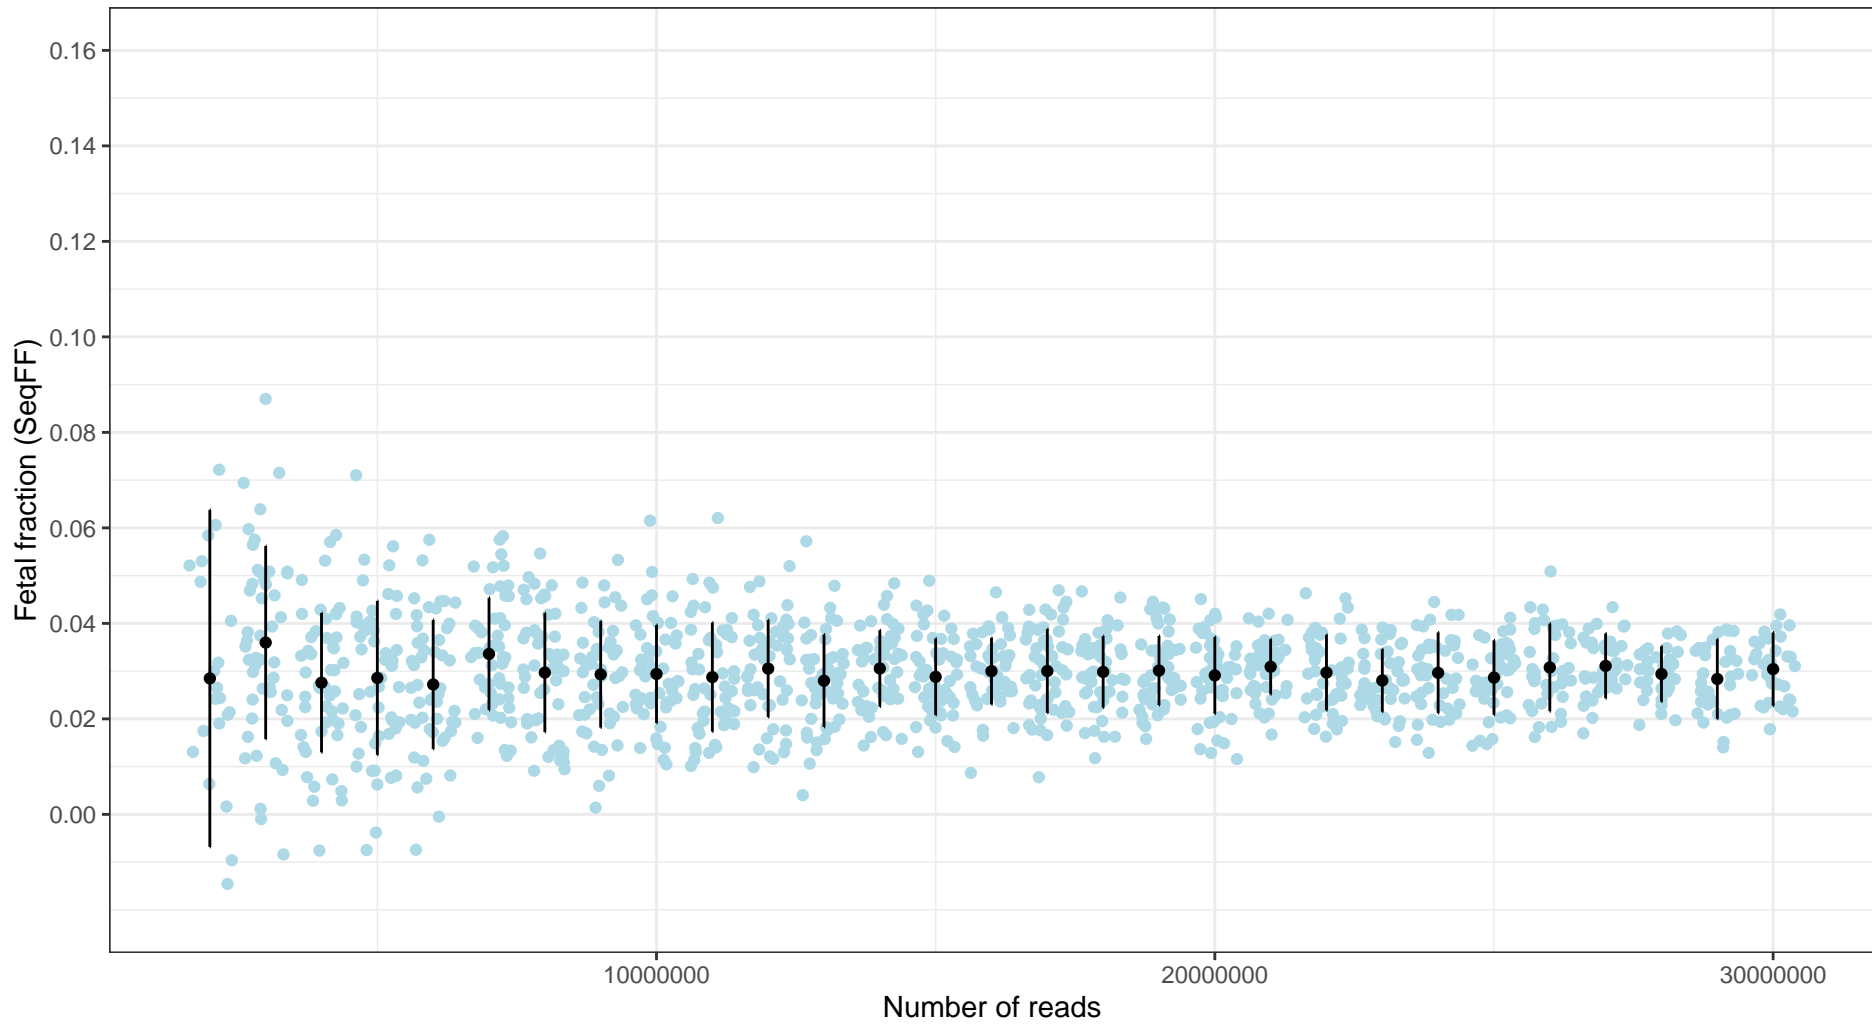

Computational sample

reshuf\_4percent

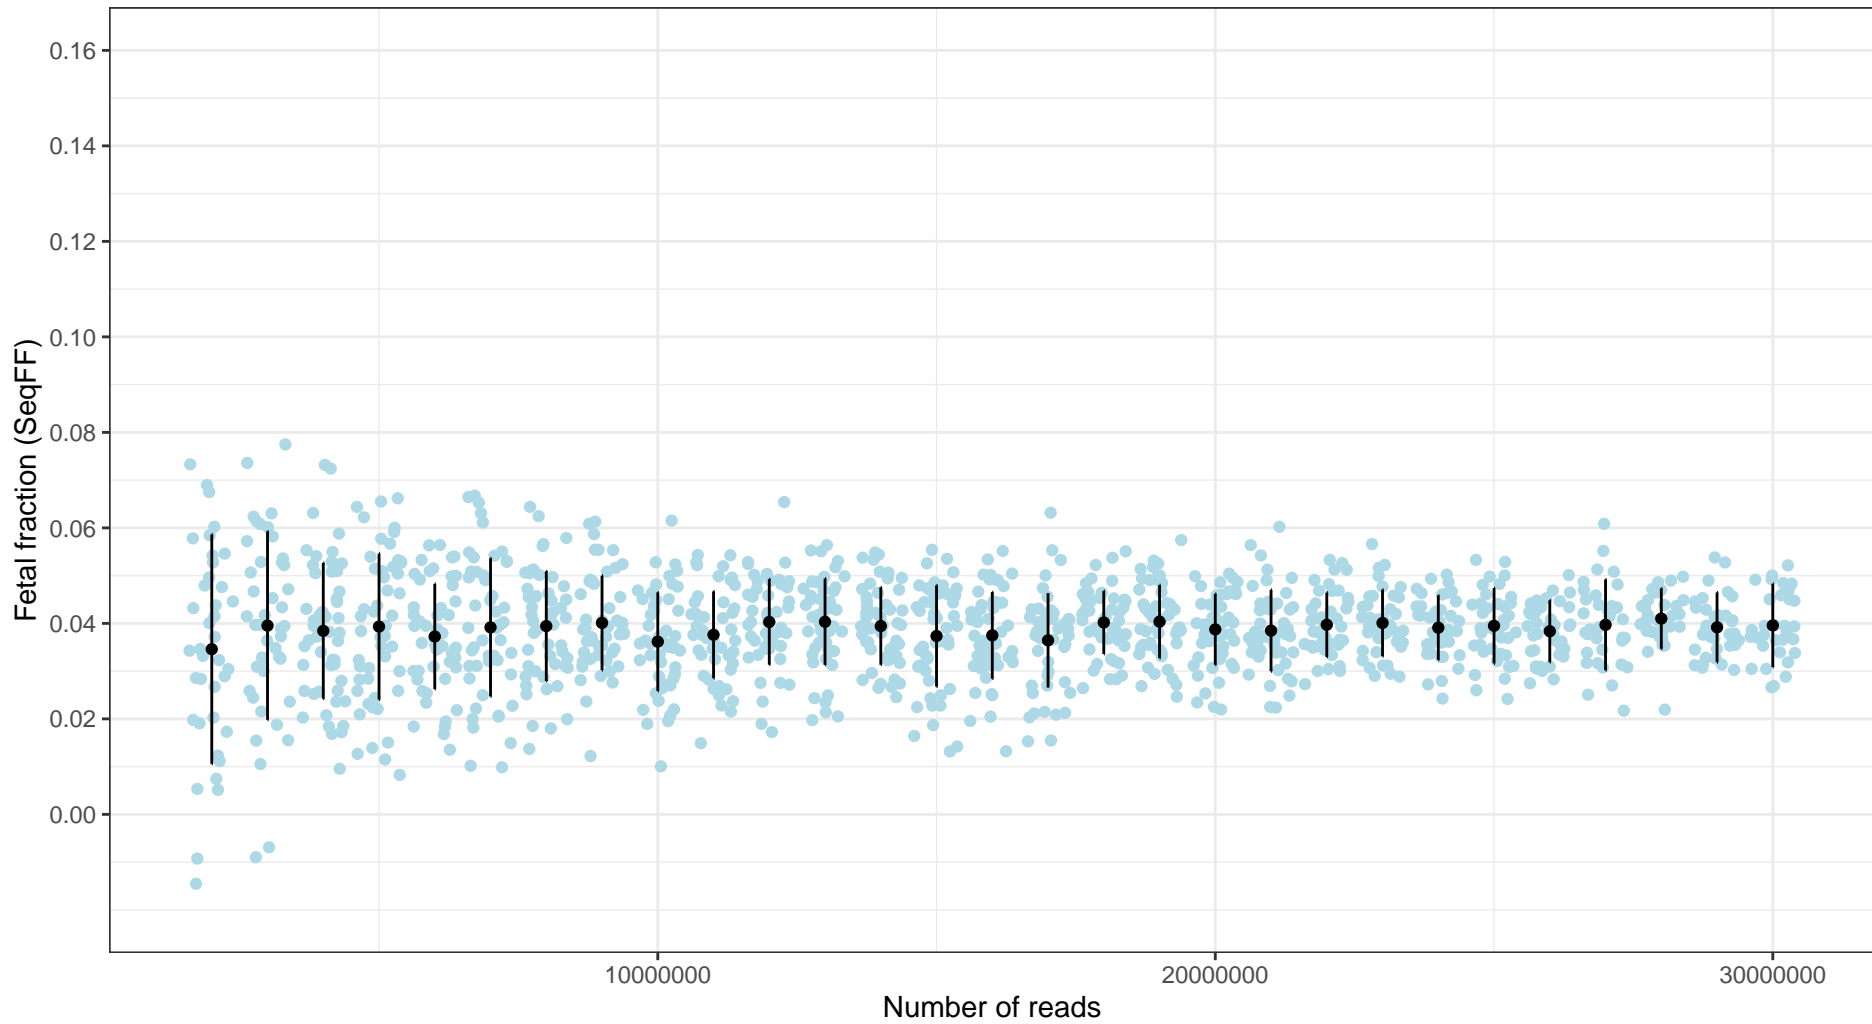

Computational sample

reshuf\_5percent

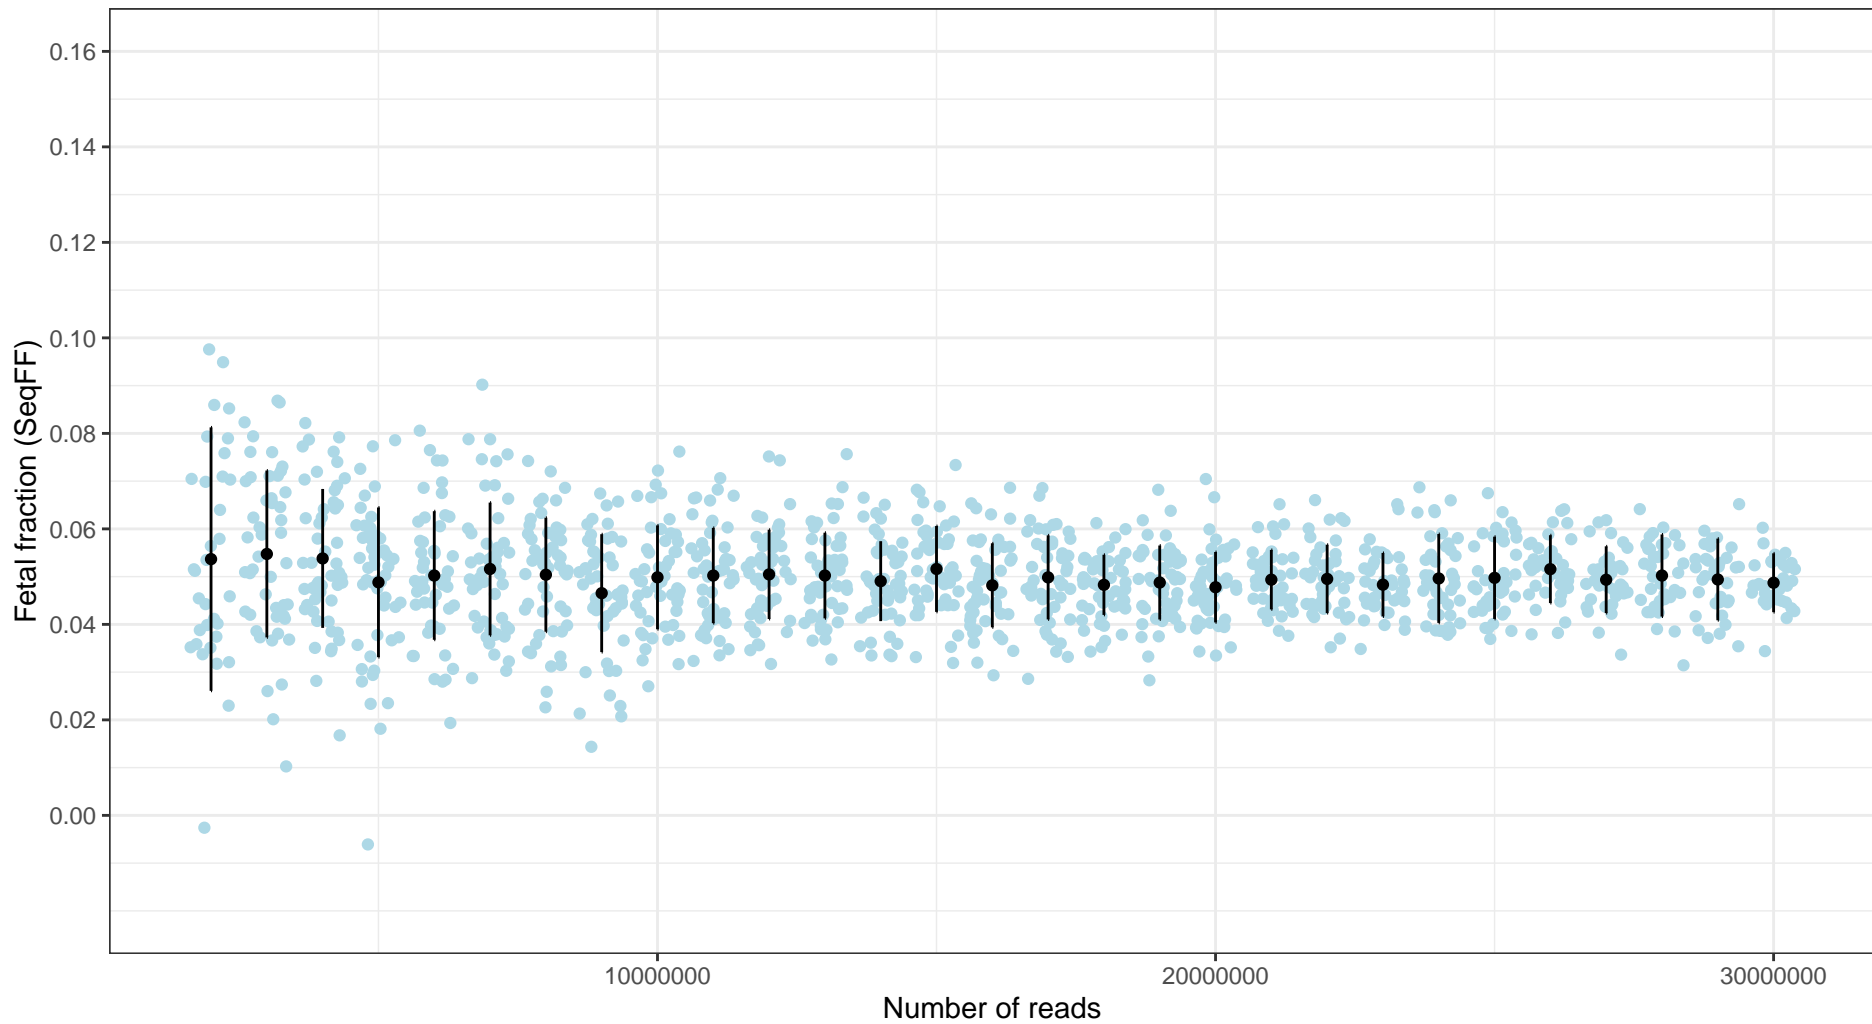

Computational sample

reshuf\_6percent

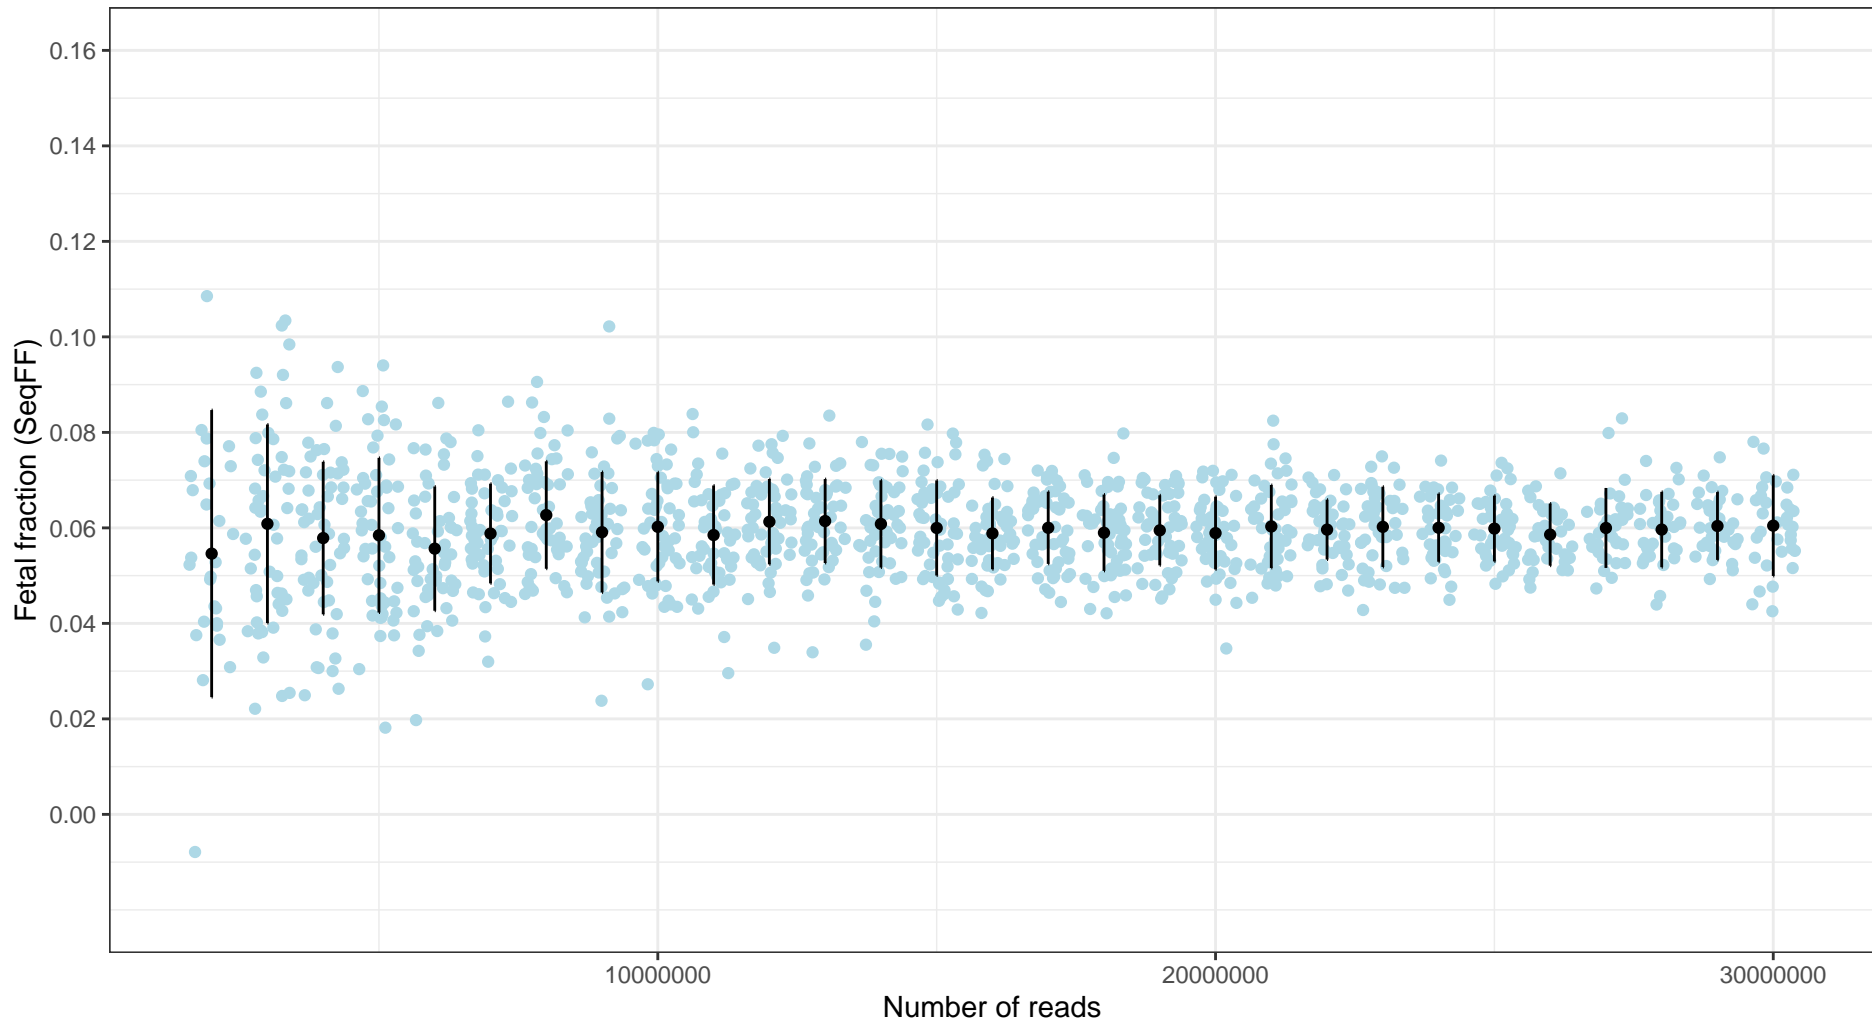

Computational sample

reshuf\_7percent

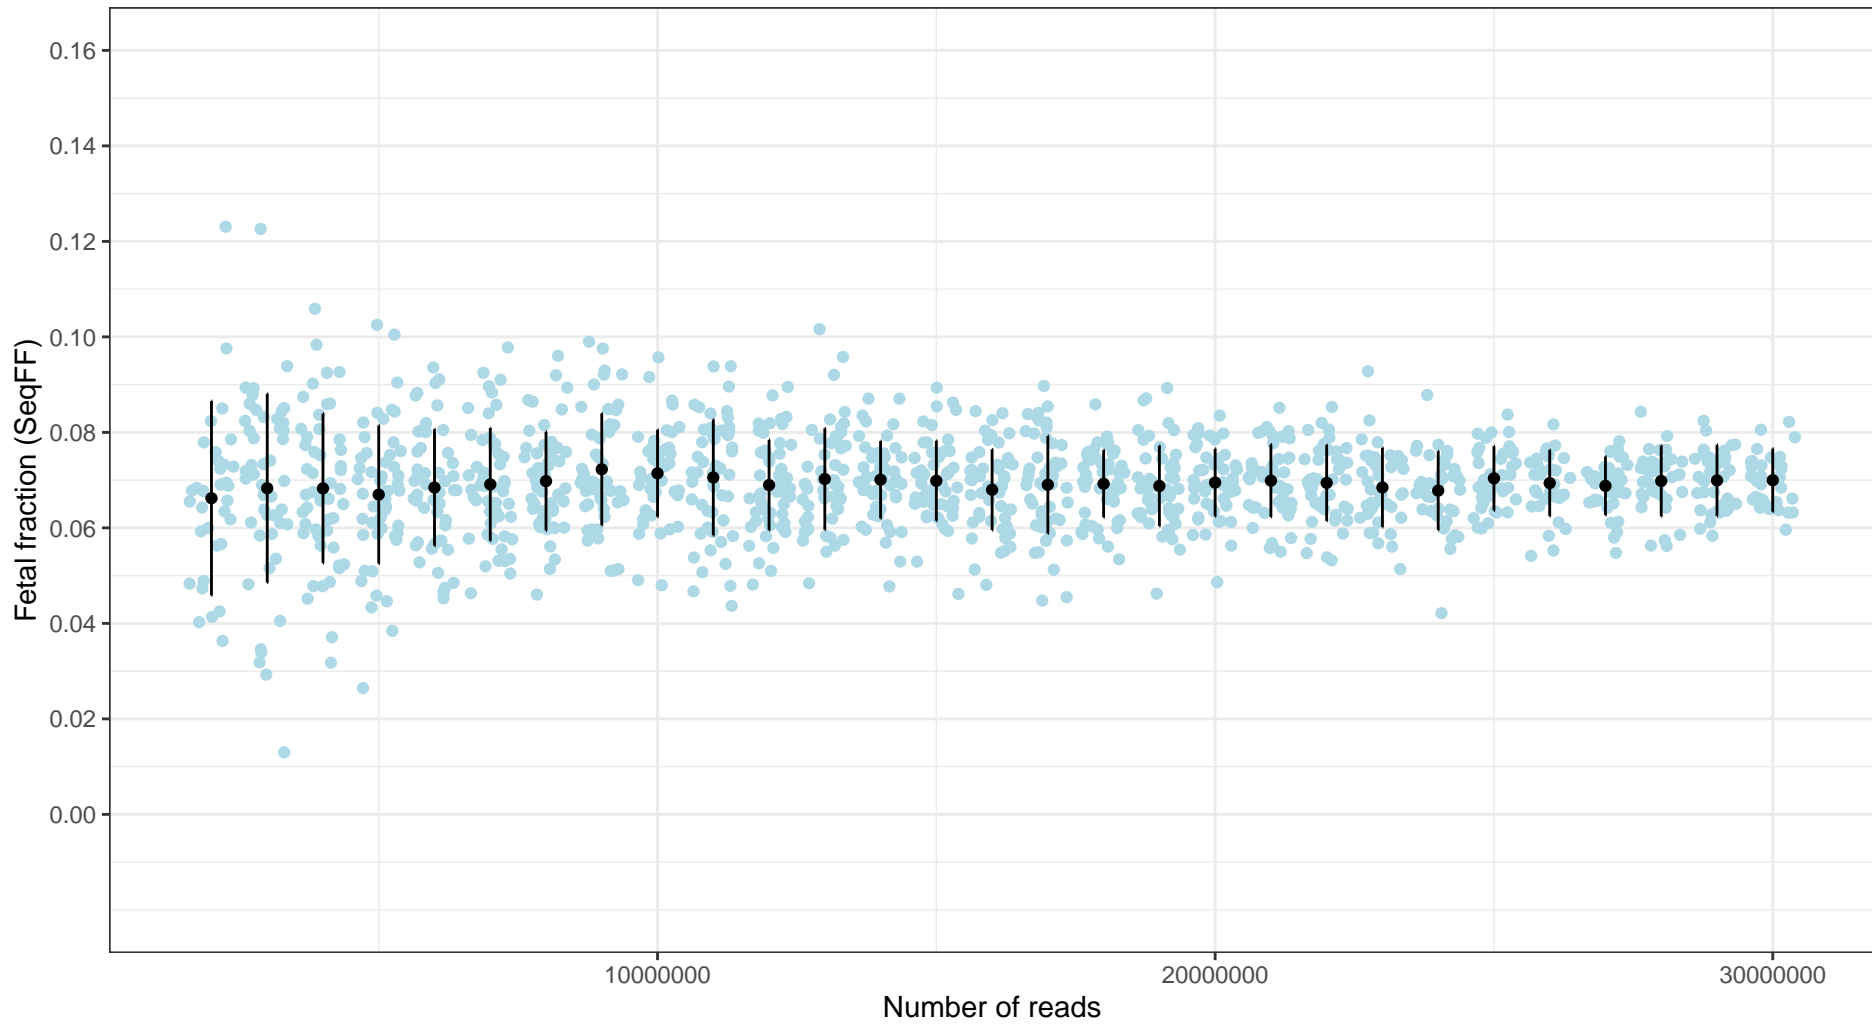

Computational sample

reshuf\_8percent

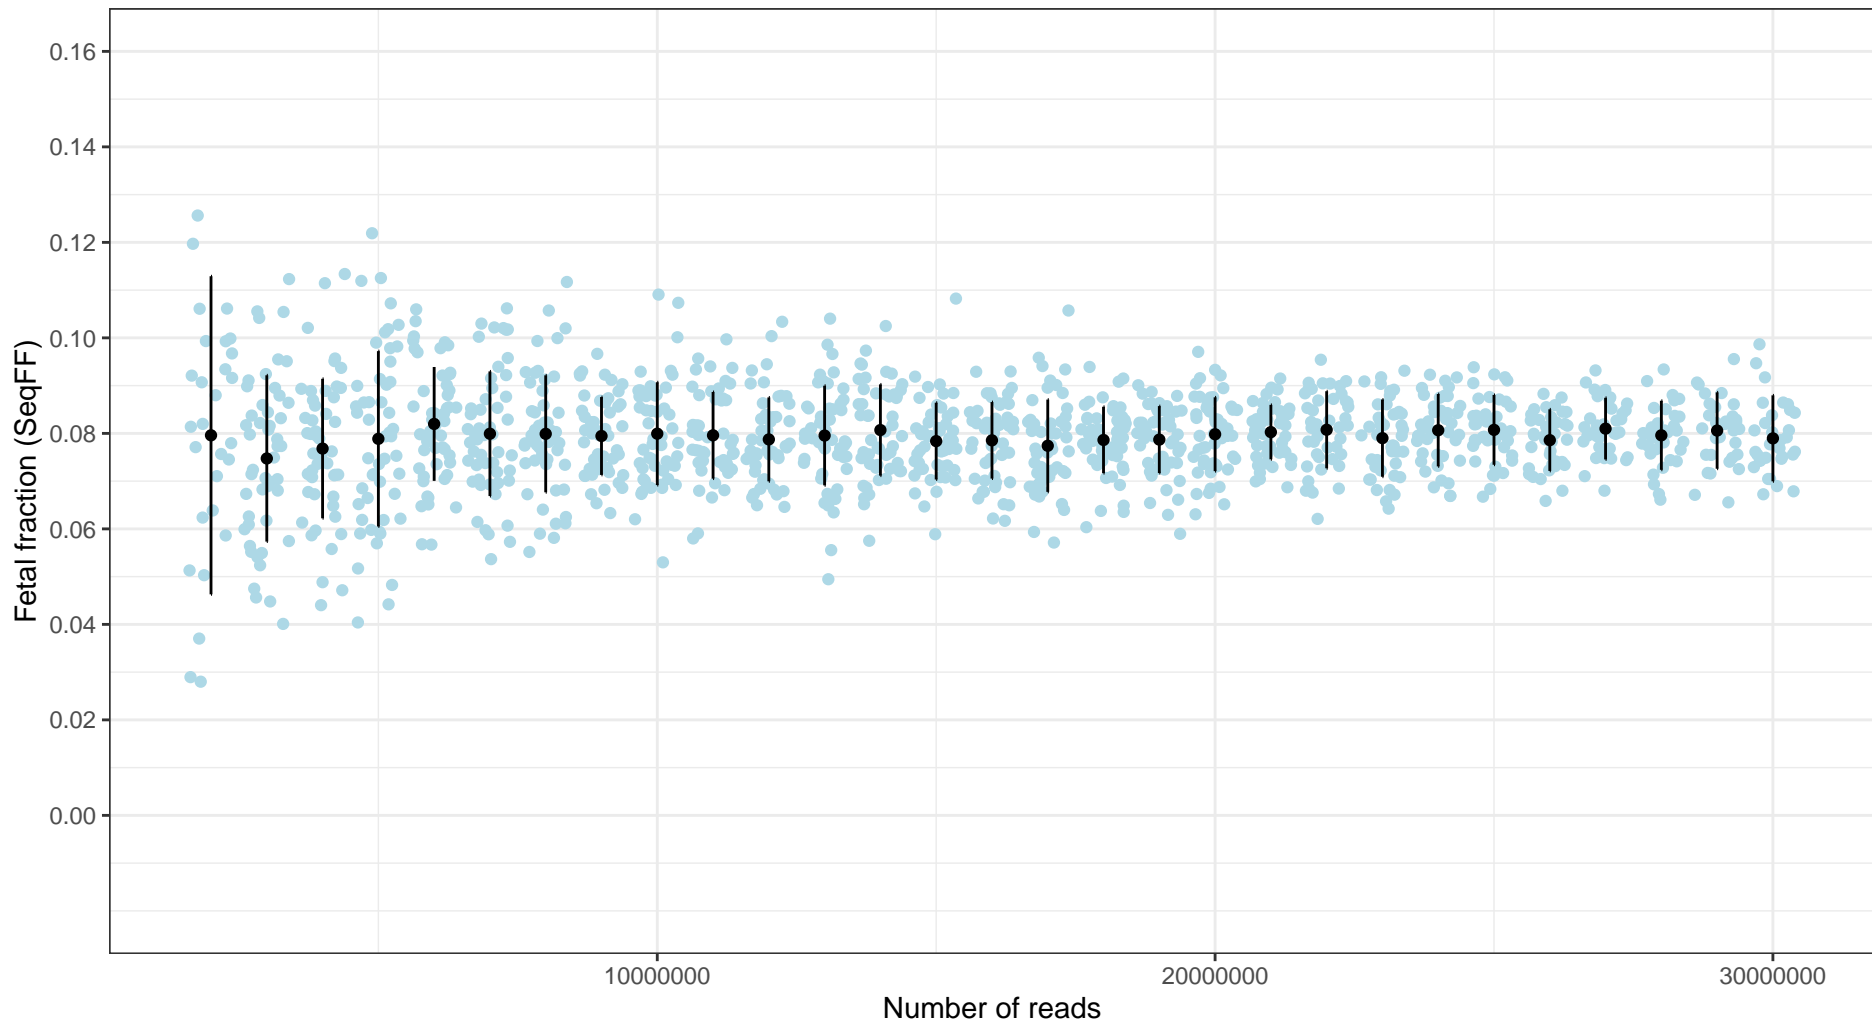

Computational sample

reshuf\_9percent

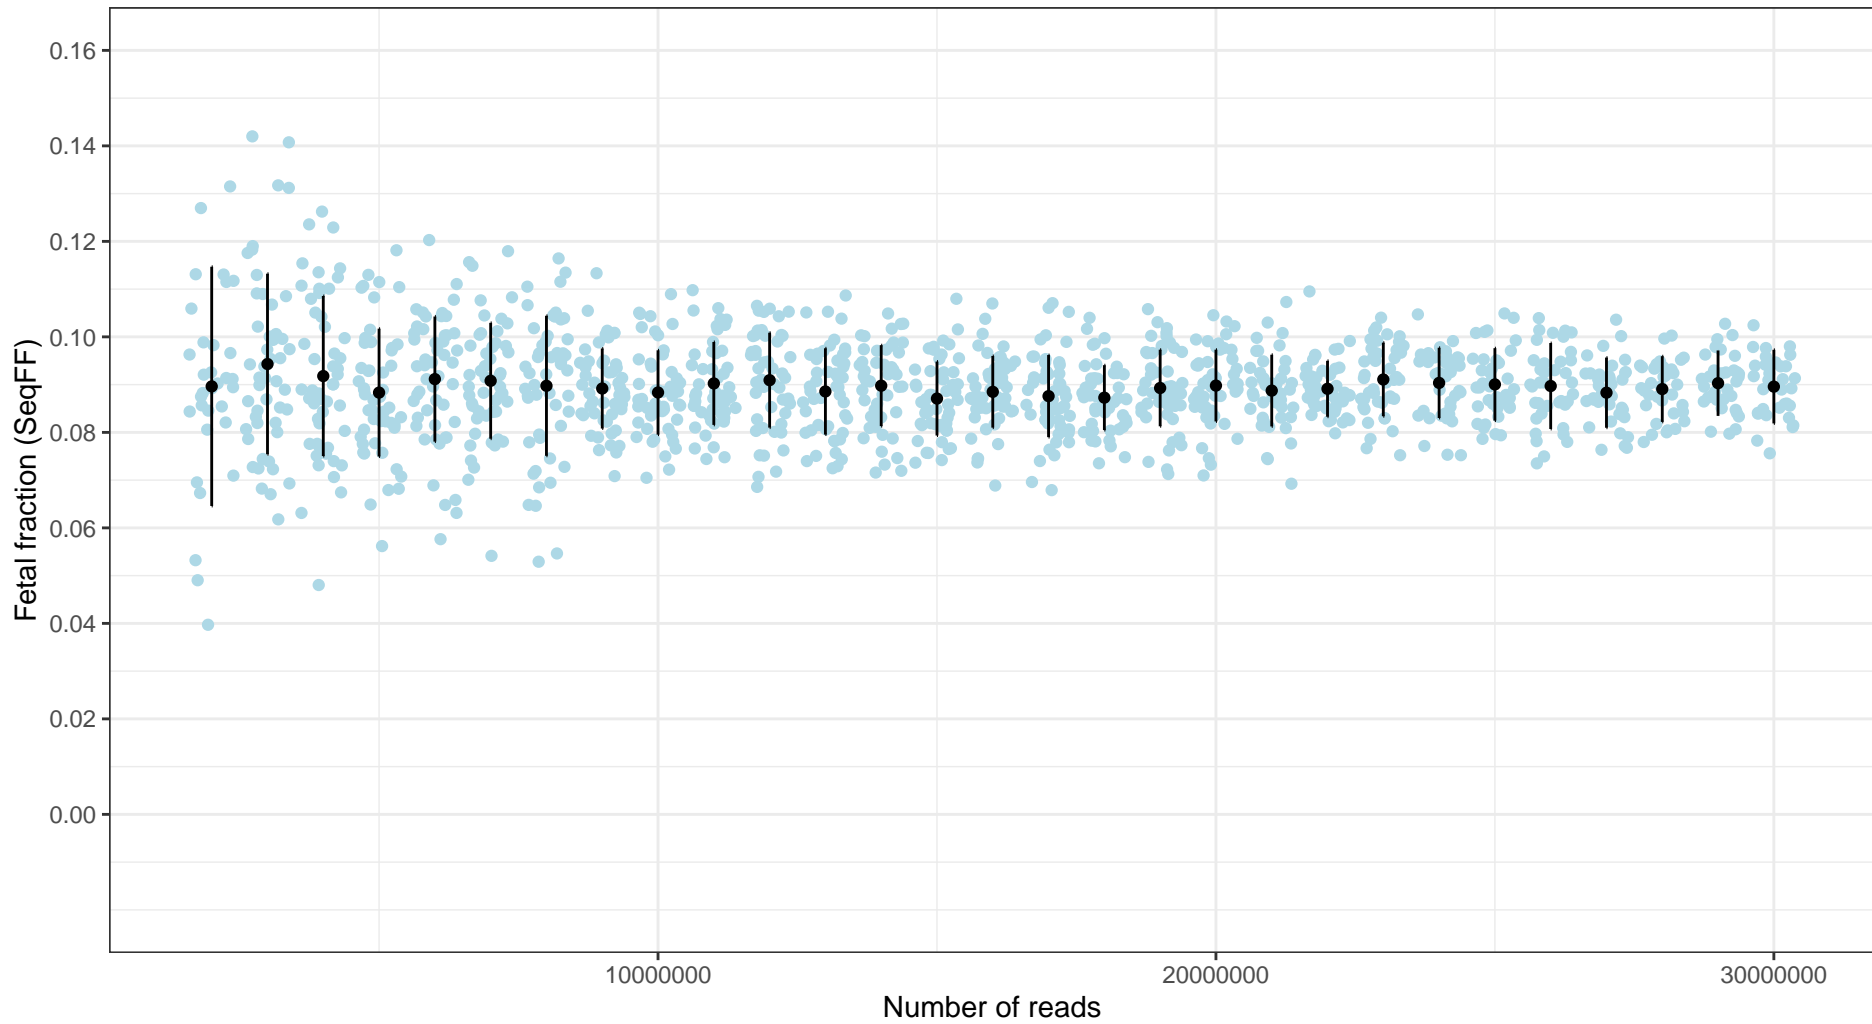



# Computational sample

reshuf\_10percent

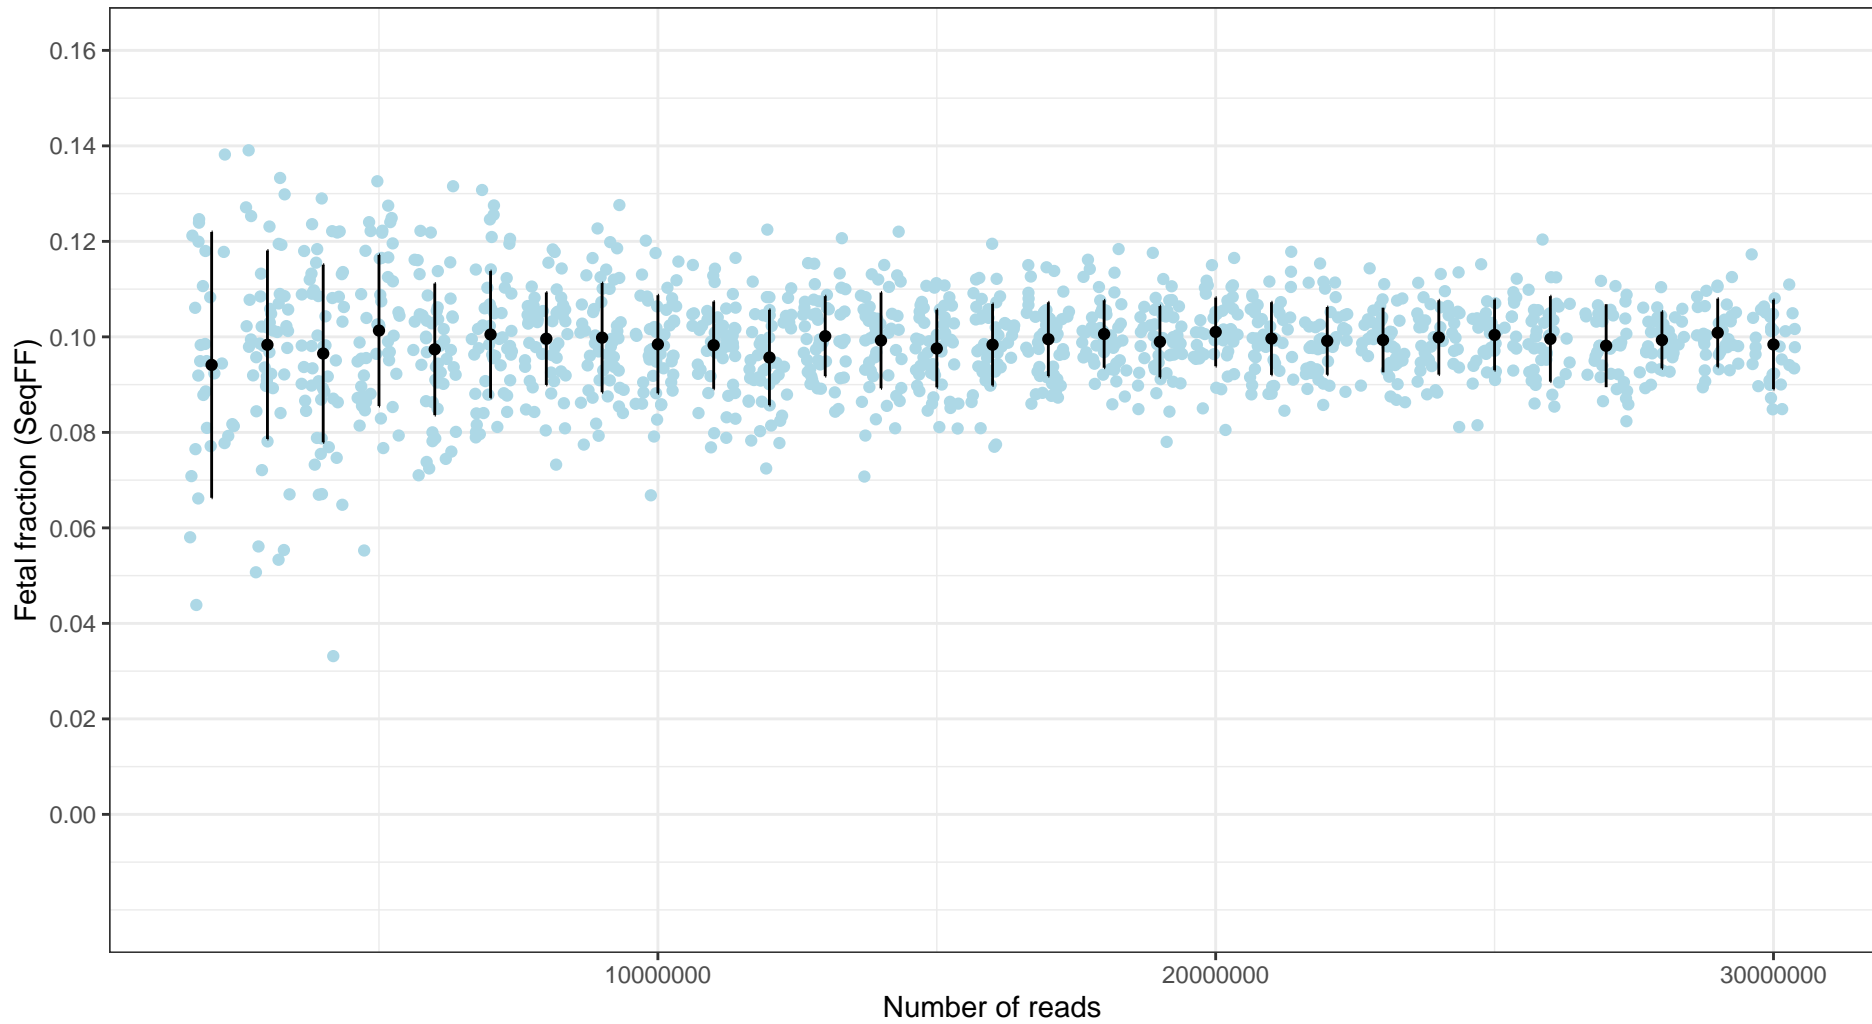

Computational sample

reshuf\_12percent

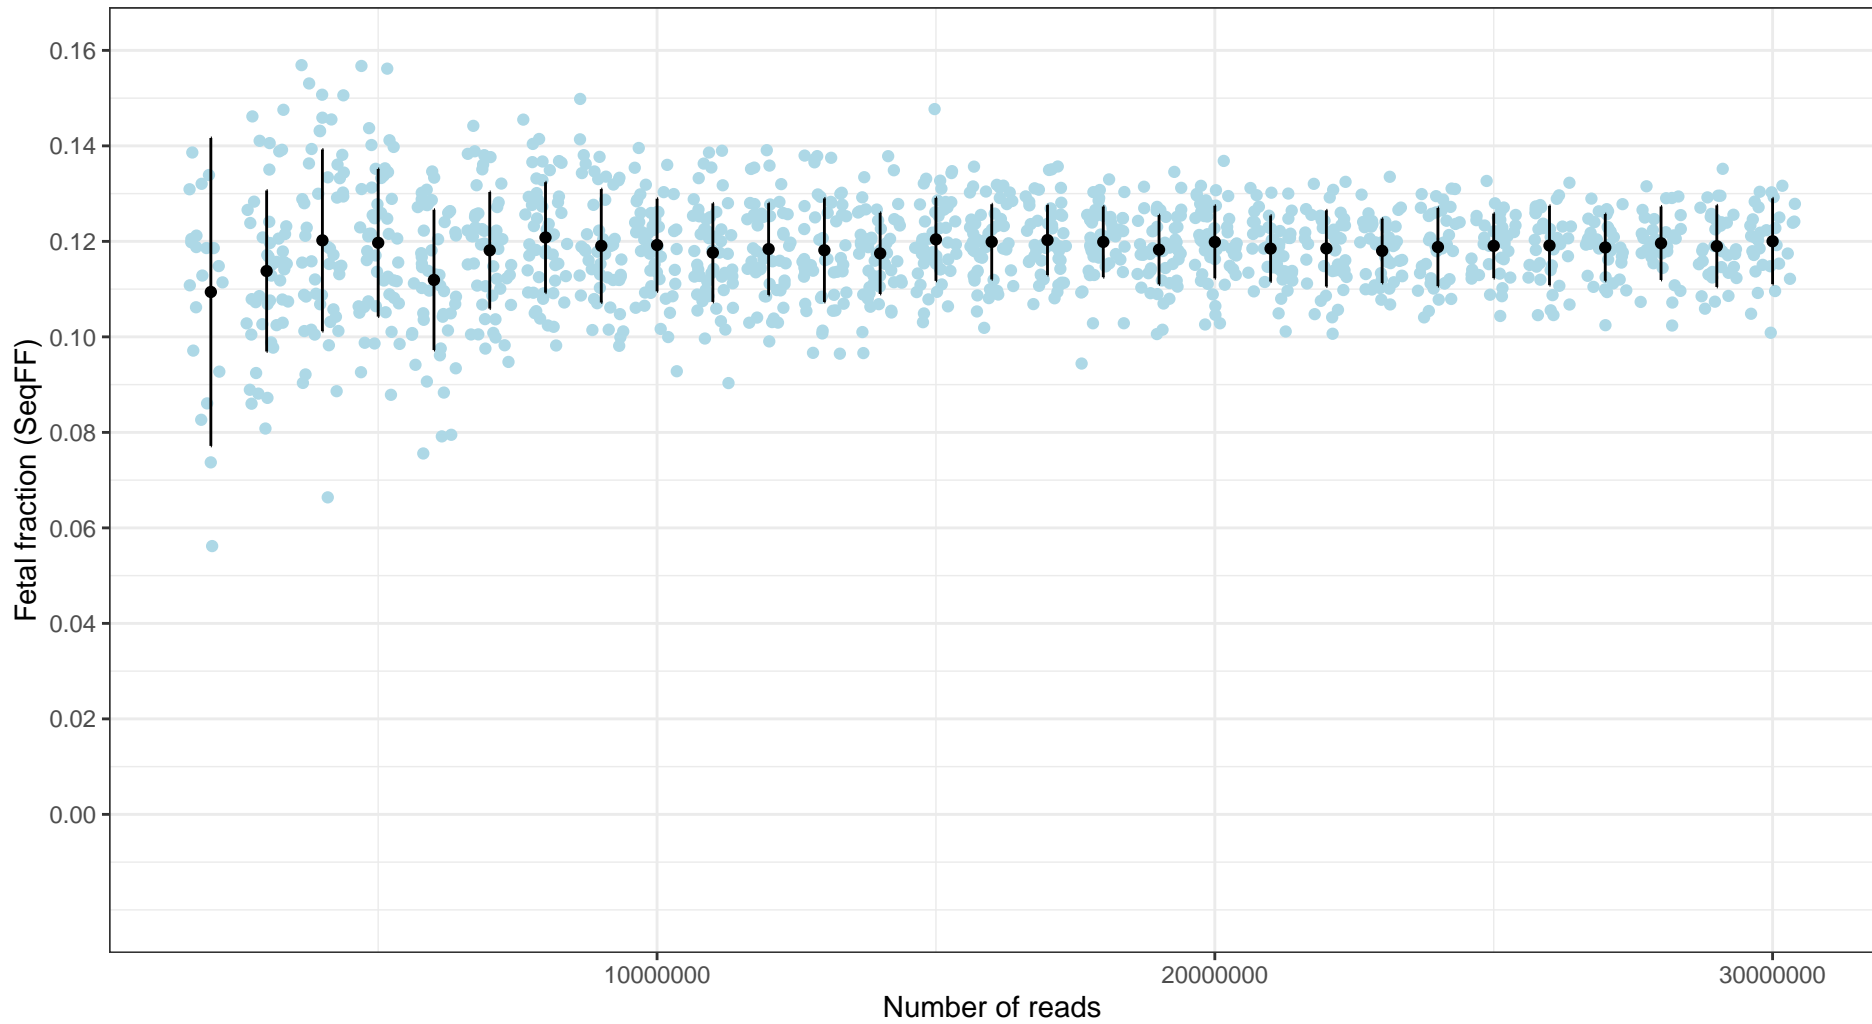

# Computational sample

reshuf\_13percent

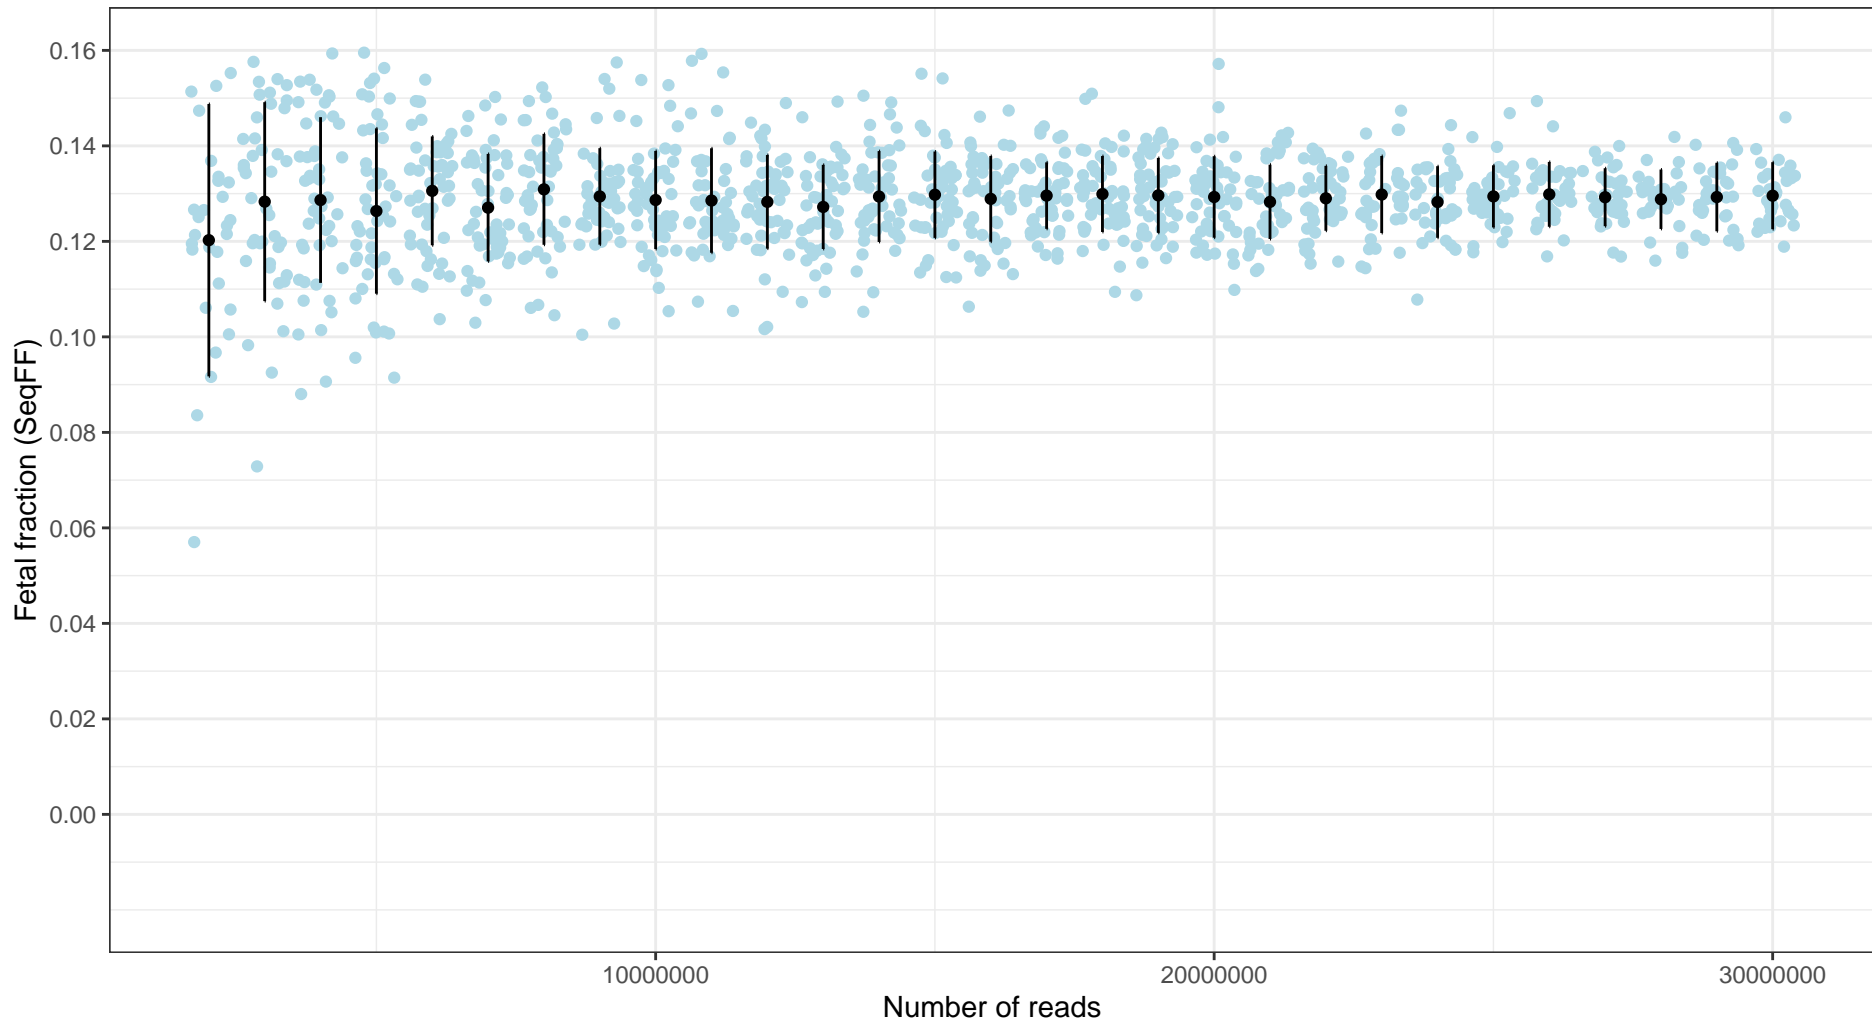

Supplement: MGG3-9-e1653-s002.pdf [file MGG3-9-e1653-s002.pdf]
